# Supplementary material
Source: publisher site journal article supplement (https://www.dovepress.com/article/280464)
Supplement: Supplementary file 1 [file get_supplementary_file.php]

**Supplementary Table 1. Comparison of the characteristics between users of long-acting muscarinic antagonist (LAMA) or long-acting β2 agonist (LABA) alone and LAMA/LABA combinations**

|  |  | Total (n = 243) | | |
| --- | --- | --- | --- | --- |
|  |  | LAMA or LABA  (n = 80) | LAMA/LABA  (n = 163) | p‒value |
| Age, years | | 73 (71‒73) | 74 (73‒75) | 0.57 |
| Male, n (%) | | 68 (85％) | 141 (87%) | 0.75 |
| CAT |  | 12 (10.3‒13.7) | 15 (14.1‒16.4) | <0.01 |
| mMRC |  | 1.0 (0.8‒1.2) | 1.5 (1.4‒1.7) | <0.01 |
| HADS-anxiety | | 4.8 (4.1‒5.5) | 4.9 (4.3‒5.5) | 0.91 |
| HADS-depression | | 5.8 (5.1‒6.6) | 6.1 (5.5‒6.7) | 0.77 |
| Satisfaction | | 36 (46%) | 46 (28%) | <0.01 |
| Lung function tests | |  |  |  |
|  | VC, L | 3.2 ± 0.87 | 3.0 ± 0.77 | 0.13 |
|  | %VC, % | 97.2 (92.7‒101.7) | 93.7 (90.5‒96.8) | 0.33 |
|  | FEV1, L | 1.9 (1.7‒2.0) | 1.5 (1.5‒1.6) | <0.01 |
|  | %FEV1, %pred | 73.1 ± 19.3 | 63.1 ± 21.9 | <0.01 |
| Living alone | | 21 (26%) | 39 (24%) | 0.69 |
| ASK-20 questionnaire | |  |  |  |
| Total ASK-20 scores | | 39.1 (37.3‒41) | 39.5 (38.2‒40.7) | 0.8 |
|  | Lifestyle | 11.8 (11.2‒12.4) | 11.8 (11.3‒12.2) | 0.72 |
|  | Attitude and beliefs toward your treatment | 4.9 (4.6‒5.3) | 4.9 (4.6‒5.1) | 0.96 |
|  | Help from others | 2.7 (2.4‒3.0) | 2.9 (2.7‒3.1) | 0.28 |
|  | Talking with healthcare team | 6.3 (5.7‒6.8) | 6.5 (6.1‒6.9) | 0.49 |
|  | Taking medicines | 6.2 (5.7‒6.8) | 6.7 (6.3‒7.2) | 0.24 |
|  | Have you… | 7.1 (6.5‒7.9) | 6.7 (6.3‒7.0) | 0.35 |
| TBCs |  | 3.8 (3.3‒4.4) | 3.8 (3.5‒4.2) | 0.96 |
| **Notes:** Differences of p < 0.05 were considered statistically significant.  **Abbreviations:** ASK-20: Adherence Starts with Knowledge- 20, CAT: the COPD Assessment Test, , FEV1: forced expiratory volume in 1 second, %FEV1: % predicted forced expiratory volume in 1 second, HADS: the Hospital Anxiety and Depression Scale, LABA: long-acting β2 agonist, LAMA: long-acting muscarinic antagonist, mMRC: the modified Medical Research Council, TBCs: total barrier counts, VC: vital capacity, %VC: % predicted vital capacity. | | | | |

**Supplementary Table 2. Comparison of the characteristics between users of short-acting beta2-agonist (SABA) or no use of SABA**

|  |  | Total (n = 319) | | |
| --- | --- | --- | --- | --- |
|  |  | Use of SABA  (n = 38) | No use of SABA  (n = 281) | p-value |
| Age, years |  | 72 (69‒75) | 74 (73‒75) | 0.57 |
| Male, n (%) |  | 33 (87%) | 245 (87%) | 0.95 |
| CAT |  | 18.1 (15.3‒21) | 14 (13.1‒15) | <0.01 |
| mMRC |  | 1.7 (1.3‒2.1) | 1.3 (1.2‒1.4) | 0.03 |
| HADS-anxiety |  | 5.7 (4.3‒7.2) | 4.8 (4.4‒5.2) | 0.22 |
| HADS-depression |  | 6.6 (5‒8) | 6.0 (5.7‒6.5) | 0.67 |
| Satisfaction |  | 11 (29%) | 95 (34%) | 0.53 |
| Lung function tests | | | | |
|  | VC,L | 3.0 ± 0.7 | 3.1 ± 0.8 | 0.5 |
|  | %VC,% | 92.8 (85.6‒100) | 96.1 (93.6‒98.5) | 0.44 |
|  | FEV1,L | 1.3 (1.1‒1.6) | 1.6 (1.6‒1.7 | 0.01 |
|  | %FEV1,%pred | 55.0 ± 26.0 | 66.7 ± 21.6 | <0.01 |
| living alone |  | 11 (29％) | 62 (22％) | 0.34 |
| ASK-20 questionnaire | |  |  |  |
| Total ASK-20 scores | | 39.2 (36.8-41.7) | 39 (38‒40) | 0.85 |
|  | Lifestyle | 11.8 (10.9‒12.8) | 11.7 (11.3‒12) | 0.64 |
|  | Attitude and beliefs toward your treatment | 4.9 (4.5‒5.4) | 4.8 (4.6‒5.0) | 0.47 |
|  | Help from others | 2.7 (2.3‒3.1) | 2.8 (2.6‒3.0) | 0.83 |
|  | Talking with healthcare team | 6.3 (5.4‒7.4) | 6.4 (6.1‒6.7) | 0.59 |
|  | Taking medicines | 7.1 (6.0‒8.1) | 6.4 (6.1‒6.7) | 0.38 |
|  | Have you… | 6.2 (5.5‒7.0) | 6.8 (6.5‒7.2) | 0.2 |
| TBCs |  | 4.1 (3.4‒4.9) | 3.7 (3.4‒4.0) | 0.15 |
| **Notes:** Differences of p < 0.05 were considered statistically significant.  **Abbreviations:** ASK-20: Adherence Starts with Knowledge- 20, CAT: the COPD Assessment Test, , FEV1: forced expiratory volume in 1 second, %FEV1: % predicted forced expiratory volume in 1 second, HADS: the Hospital Anxiety and Depression Scale, mMRC: the modified Medical Research Council, SABA: short-acting beta2-agonist, TBCs: total barrier counts, VC: vital capacity, %VC: % predicted vital capacity. | | | | |
